# The efficacy and safety of sevelamer and lanthanum versus calcium-containing and iron-based binders in treating hyperphosphatemia in patients with chronic kidney disease: a systematic review and meta-analysis

Steven Habbous<sup>1</sup>, Sebastian Przech<sup>1</sup>, Rey Acedillo<sup>1,2</sup>, Sisira Sarma<sup>1</sup>, Amit X. Garg<sup>1,2</sup> and Janet Martin<sup>1,3</sup>

<sup>1</sup>Department of Epidemiology & Biostatistics, Western University, London, ON, Canada, <sup>2</sup>London Health Sciences Centre, Division of Nephrology, Western University, London, ON, Canada and <sup>3</sup>Centre for Medical Evidence, Decision Integrity & Clinical Impact (MEDICI), Department of Anesthesia & Perioperative Medicine, Western University, Room B3-412, 339 Windermere Road, London, ON N6A 5A5, Canada

Correspondence and offprint requests to: Janet Martin; E-mail: jmarti83@uwo.ca

## ABSTRACT

**Background.** It remains unclear which phosphate binders should be preferred for hyperphosphatemia management in chronic kidney disease (CKD).

**Methods.** We performed a systematic review and meta-analysis of randomized trials comparing sevelamer or lanthanum with other phosphate binders in CKD.

**Results.** Fifty-one trials (8829 patients) were reviewed. Compared with calcium-based binders, all-cause mortality was nonsignificantly lower with sevelamer {risk ratio [RR] 0.62 [95% confidence interval (CI) 0.35–1.08]} and lanthanum [RR 0.73 (95% CI 0.18–3.00)], but risk of bias was concerning. Compared with calcium-based binders, sevelamer reduced the risk of hypercalcemia [RR 0.27 (95% CI 0.17–0.42)], as did lanthanum [RR 0.12 (95% CI 0.05–0.32)]. Sevelamer reduced hospitalizations [RR 0.50 (95% CI 0.31–0.81)], but not lanthanum [RR 0.80 (95% CI 0.34–1.93)]. The presence/absence of other clinically relevant outcomes was infrequently reported. Compared with calcium-based binders, sevelamer reduced serum calcium, low-density lipoprotein and coronary artery calcification, but increased intact parathyroid hormone. The clinical relevance of these changes is unknown since corresponding clinical outcomes were not reported. Lanthanum had less favorable impact on biochemical parameters. Sevelamer hydrochloride and sevelamer carbonate were similar in three studies. Sevelamer was similar to lanthanum (three studies) and iron-based binders (three studies).

**Conclusion.** Sevelamer was associated with a nonsignificant reduction in mortality and significantly lower hospitalization rates and hypercalcemia compared with calcium-based binders. However, differences in important outcomes, such as cardiac events, fractures, calciphylaxis, hyperchloremic acidosis and health-related quality of life remain understudied. Lanthanum

and iron-based binders did not show superiority for any clinically relevant outcomes. Future studies that fail to measure clinically important outcomes (the reason why phosphate binders are prescribed in the first place) will be wasteful.

**Keywords:** chronic kidney disease, hyperphosphatemia, lanthanum, sevelamer, systematic review

## INTRODUCTION

Chronic kidney disease (CKD) affects 5% of adults, is very costly and is associated with a high risk of mortality and hospitalization [1–3]. Some of the poor outcomes for patients with CKD have been attributed to the inability of diseased kidneys to excrete dietary phosphate, leading to complex mineral and bone disorders and arterial calcification, which is thought to lead to increased risk of adverse cardiac events and premature mortality [4–7]. Phosphate binders have become the mainstay of prevention and management of hyperphosphatemia among patients with CKD, particularly the calcium-based phosphate binders (CBPBs) calcium carbonate and calcium acetate [8, 9]. Although inexpensive and highly effective in reducing serum phosphorus levels, CBPBs may result in elevated serum calcium and adverse clinical events related to hypercalcemia, potentially increasing the risk of vascular calcification and arterial stiffening. This prompted the development of calcium-free phosphate binders, including sevelamer hydrochloride, sevelamer carbonate, lanthanum carbonate and iron-based binders [10, 11].

Whether calcium-free binders improve clinically important outcomes compared with CBPBs still remains a matter of debate [12]. Recent systematic reviews failed to adequately address all clinically important outcomes (cardiac events, bone fractures, hypercalcemia, hospitalization, all-cause mortality) and failed to adequately address missing data and losses to

follow-up [13–15, 13, 16, 17]. Moreover, clinical relevance of comparisons among the non-calcium-containing binders also need to be determined [11, 18]. The purpose of this systematic review and meta-analysis is to reevaluate the evidence reporting the safety and efficacy of calcium-free phosphate binders in CKD patients and to make recommendations for future research in this area.

## METHODS

### Search strategy and inclusion criteria

PubMed, Embase and Cochrane Central were searched on 19 January 2015 using the search terms ‘sevelamer’ OR ‘renagel’ OR ‘renvela’, supplemented with ‘lanthanum carbonate’ on 9 February 2016; ‘phosphate binder’ AND ‘iron’ was added as an addendum to our original protocol (PROSPERO CRD42 015024667). Reference lists from publications were also reviewed for additional citations. Screening was performed by a single author (S.H.) and data extraction was performed independently by S.H. and S.P. Eligible studies were randomized trials on adults (>18 years of age) published in peer-reviewed journals (i.e. not abstracts) that compared sevelamer, lanthanum or iron-based binders with any other phosphate binder (excluding studies where only a nonactive placebo control was used or where a combination of active controls was used). Studies were not restricted by language, year of publication or study size.

### Data collection

Studies were classified by dialysis modality as chronic (>2 months) hemodialysis (HD), incident HD, chronic peritoneal dialysis (PD) and non-dialysis-dependent (NDD)-CKD. Information collected included ethnicity (by patient country of origin), follow-up time, study size, age at randomization, untreated serum phosphorus levels for patient inclusion (i.e. after washout), and study design (crossover versus parallel-arm trial; single versus multicentered; double-blind versus open-label; fixed dosing versus treat to target). Results from crossover trials were combined with noncrossover trials. If numeric data were unavailable, graphical representations were digitized (<http://arohatgi.info/WebPlotDigitizer/>).

### Risk of bias assessment

Study bias was assessed using the Cochrane Risk of Bias tool by considering the possibility of selection bias, measurement bias (blinding of subjects and study personnel ascertaining subjective outcomes such as like coronary artery calcification), number and reason for participant withdrawal, method of randomization and clear reporting of outcomes [19]. Other bias was considered ‘unclear’ if sample size was small (<100 patients, or <50 if crossover), or if the sample size was <200 (100 if crossover) and the trial was not registered. Double-blind studies were not considered to have a low risk of bias if the method of blinding was not described.

### Study outcomes

The primary outcome was all-cause mortality. Secondary analyses included major adverse cardiovascular events, bone-related events (i.e. fractures, osteoporosis), calciphylaxis and biochemical events (hypercalcemia, hyperchloremic acidosis). Other secondary outcomes included loss to follow-up (as this may be a source of undocumented adverse events attributable to treatment) and hospitalization rates. Although they are of uncertain clinical relevance, we also extracted biochemical parameters at the end of the study, including serum phosphorus, corrected serum calcium, low-density lipoprotein (LDL), intact parathyroid hormone (iPTH) and coronary artery calcification (CAC).

### Statistical methods and subgroup analyses

Risk ratios (RRs) with 95% confidence intervals (CIs) were calculated for discrete outcomes. Mean differences (MDs) were used to compare continuous outcomes (biochemical values). The number needed to treat (NNT) was calculated by pooling studies with similar follow-up time [20, 21]. The random effects model was used for all analyses. Review Manager 5.3 was used to prepare meta-analyses, present risk of bias tables, generate forest plots and calculate pooled estimates. Review Manager applies a continuity correction of 0.5 to all cells of binary outcomes for studies with single zeros (double-zero studies are omitted) [22]. The methodology for incorporating double-zero studies has been provided without the need for continuity correction [23]. Thus, we supplemented the pooled estimates generated by Review Manager with these beta-binomial regression methods using the macro provided by Kuss in SAS version 9.4 [23]. Trials that reported the absence of events were included, while those that failed to report whether or not events occurred were omitted.

*A priori*-defined subgroup analyses were conducted if substantive (significant and important) heterogeneity was present. Mortality was also evaluated in subgroups by the length of follow-up (*post hoc* comparison). Subgroups included CBPBs (CaCO<sub>3</sub>, calcium acetate), ethnicity (White, Asian, other), dialysis status (chronic HD, incident HD, NDD-CKD, PD) and nature of dosing (treat to target/variable, fixed). Heterogeneity across studies and between subgroups was assessed using Cochrane’s Q (P-values) and Higgin’s  $I^2$ , together with visual inspection of forest plots [24]. When necessary, standard deviations (SDs) were calculated by multiplying standard errors by the square root of the sample size or estimated by single imputation using values from a similar study [19]. Publication bias was assessed using funnel plots and Egger’s regression using Stata version 13.0. Meta-regression was conducted with Stata version 13.0 using log RR as the outcome. Regression coefficients were exponentiated for interpretability.

## RESULTS

The search strategy yielded 3002 citations, of which 164 remained after screening (Figure 1). After further excluding duplicate study populations and abstracts, 51 unique

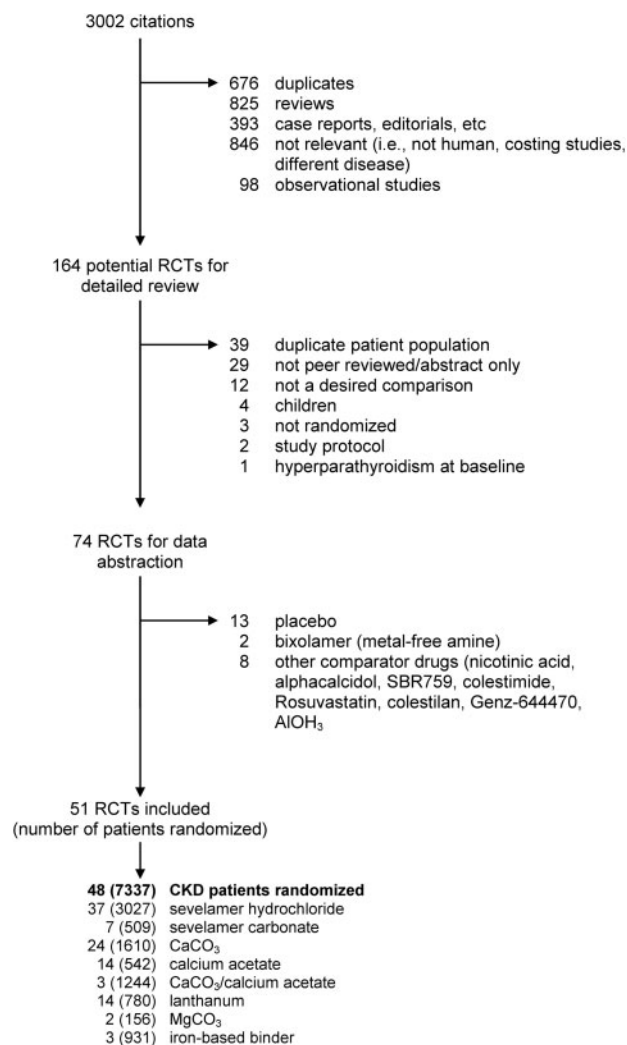

FIGURE 1: Search strategy for inclusion and exclusion of studies.

randomized trial populations met the inclusion criteria [25–75] randomizing 8829 CKD patients (Figure 1, Table 1). Additional data were extracted from four *post hoc* analyses [76–79]. Because of differences in the size and taste of the tablets, 91% ( $n = 42$ ) of studies were open label. Twenty-eight (55%) trials were multicenter, 12 (24%) were crossover and 43 (84%) randomized dialysis-dependent CKD patients (36 chronic HD, 3 incident HD, 3 chronic PD and 1 HD/PD). When funding sources were provided, 17/32 (53%) were industry-sponsored trials. Trial follow-up ranged from 2 weeks to 3 years. Overall, there was a low risk of selection bias and bias due to outcome ascertainment, but there was moderate risk of bias due to incomplete outcome data and selective reporting (Supplementary data, Figure S1).

### Mortality

Sevelamer versus CBPBs: While most studies individually lacked sufficient sample size to reliably detect mortality differences between groups, combination through meta-analysis suggested a trend toward lower risk of death among patients receiving sevelamer (325/1870 deaths) compared with CBPBs (426/1899 deaths) in 12 studies [RR 0.62 (95% CI 0.35–1.08)] (Figure 2, Table 2). After excluding the study with substantial

risk of attrition bias (the largest study [53]), the risk reduction in mortality was strengthened [RR 0.51 (95% CI 0.32–0.83)] and the observed heterogeneity across CBPB subgroups diminished (reduced from  $I^2 = 79\%$  to 30%). Mortality was rarely observed in studies that had <1 year of follow-up (Table 3), and omission of these short-term studies resulted in a similar effect size for sevelamer on mortality [RR 0.58 (95% CI 0.31–1.11)]. Only two sevelamer trials reported deaths in incident HD patients, one in NDD-CKD patients, and none in PD patients (Table 3).

Lanthanum versus CBPBs: Lanthanum versus CBPBs did not significantly reduce the risk of all-cause mortality [RR 0.73 (95% CI 0.18–3.00)] based on 3/81 deaths (lanthanum) and 4/83 deaths (calcium binders) in four studies. However, two of the larger studies were considered to have a high risk of bias due to selective reporting. Hutchison *et al.* [67] randomized 800 patients who were followed for 5 weeks and 138 participants (17%) were lost during this period. Participants were selected to remain in the study for another 20 weeks (if their serum phosphorus was well controlled). While there were no deaths reported in this study, there remains concern that deaths may have been missed in the patients lost to follow-up. In the trial of D’Haese *et al.* [60], 11/98 participants died, but the number of deaths in each arm was not stated, and hence could not be included in the meta-analysis for death. Subgroup analysis by type of CBPB did not change the results.

Evidence of publication bias was not found [ $P = 0.51$  for Egger’s test (Supplementary data, Figure S2A)]. The risk of death using the beta-binomial method was RR = 0.83 (95% CI 0.38–1.82) for sevelamer, RR = 0.68 (95% CI 0.12–3.98) for lanthanum and RR = 0.81 (95% CI 0.39–1.66) combined.

### Other clinically relevant outcomes (cardiac events, bone-related events)

Reporting on other important clinical outcomes was sparse (Table 2) and no significant differences were reported; however, the number of studies reporting outcomes provided insufficient power to yield definitive conclusions. Cardiovascular events were reported in six sevelamer trials: three reported cardiovascular mortality [RR 0.29 (95% CI 0.05–1.82); 152/1337 sevelamer, 232/1351 CBPBs] [29, 41, 53], two were unspecified [25, 32] and one was only qualitative [50] (an additional study reported a sudden death in a patient with a dilated cardiomyopathy [33]). Four lanthanum trials reported cardiovascular events, but these were also heterogeneous: one specified angina [67], two were unspecified [63, 66] and one reported any event inclusive of angina, heart failure, myocardial infarction, stroke or peripheral artery disease [65].

Bone-related adverse events were rarely documented (osteoporosis reported in one sevelamer patient [53], absence of fractures reported in one lanthanum trial [66]). This sparse reporting did not support meta-analysis (Table 2).

### Hospitalization

Hospitalization was reported in five sevelamer trials, four of which provided data amenable to meta-analysis (Figure 5B) [25, 52, 53, 80, 81]. Sevelamer was associated with a significantly lower risk of hospitalization (113/493 events) compared with

Table 1. Characteristics of included studies

| Reference                                                | Washout <sup>a</sup> | Follow-up time | Crossover | Centres | Blinding        | Ethnicity    | Random (n) | Baseline (n) | End-of-study (n) | Age, years (SD) | Percent diabetic | Dialysis vintage | Inclusion (phosphorus mg/dL) |
|----------------------------------------------------------|----------------------|----------------|-----------|---------|-----------------|--------------|------------|--------------|------------------|-----------------|------------------|------------------|------------------------------|
| <b>Sevelamer versus CaCO<sub>3</sub></b>                 |                      |                |           |         |                 |              |            |              |                  |                 |                  |                  |                              |
| Braun (2004) [25]                                        | 2 weeks              | 2 years        | No        | M       | OL              | Europe       | 114        | 55/59        | 42/40            | 56.5 (14.1)     | 13/17            | Stable HD        | ≥5.5                         |
| Caravaca (2007) [37]                                     | 2 weeks              | 3 weeks        | Yes       | S       | OL              | Spain        | 20         | 20           | 17               | 54 (17)         | NR               | CKD stages 3–4   | None                         |
| Chennasamudram (2013) [26] <sup>b</sup>                  | 2 weeks              | 8 weeks        | Yes       | S       | OL              | USA          | 15         | 7/8          | 7/8              | 54 (9)          | 100              | Chronic PD       | ≥5.5                         |
| De Santo (2006) [27]                                     | 2 weeks              | 24 weeks       | Yes       | S       | OL              | Italian      | 16         | 8/8          | 8/8              | 35–50 years     | 0                | HD 6–10 months   | ≥5.5                         |
| Di Iorio (2012) [28]                                     | None                 | 24 months      | No        | M       | OL              | Italian      | 239        | 121/118      | 107/105          | 57.9 (12.2)     | 27/29            | CKD stage 3–4    | None                         |
| Di Iorio (2013) [29]                                     | None                 | 36 months      | No        | M       | OL              | Italian      | 466        | 232/234      | 199/198          | 65.6 (14.8)     | 30/29            | New to HD        | None                         |
| Ferreira (2008) [30]                                     | 0 weeks              | 12 months      | No        | M       | OL              | Portugal     | 91         | 44/47        | 33/35            | 54.7 (14.5)     | 6/23             | HD >3 months     | <8.1                         |
| Kakuta (2011) [31]                                       | 0 weeks              | 12 months      | No        | M       | OL              | Japan        | 183        | 91/92        | 79/84            | 58.0 (12.0)     | 23/19            | Stable HD        | None                         |
| Koiva (2005) [38]                                        | 0 weeks              | 4 weeks        | No        | M       | OL              | Japan        | 56         | 29/27        | 16/20            | 57.1 (10.6)     | 23               | HD >12 months    | None                         |
| Lin (2014) [32]                                          | 2 weeks              | 48 weeks       | No        | M       | OL              | Taiwan       | 75         | 36/39        | 23/27            | 58.2 (8.0)      | NR               | HD >3 months     | ≥5.5                         |
| Russo (2007) [36]                                        | 0 weeks              | 24 months      | No        | M       | OL              | Italy        | 60         | 30/30        | 27/28            | 54.7 (12.7)     | 0                | CKD stages 3–5   | None                         |
| Sadek (2003) [33]                                        | 0 weeks              | 5 months       | No        | S       | OL              | France       | 42         | 21/21        | 15/16            | NR              | NR               | Chronic HD       | NR                           |
| Shaheen (2004) [34]                                      | 2 weeks              | 8 weeks        | Yes       | S       | OL              | Saudi Arabia | 20         | 10/10        | 19/18            | 42.7 (9.9)      | 20               | HD >3 months     | ≥5.5                         |
| Viassara (2012) [35] <sup>b</sup>                        | 0 weeks              | 8 weeks        | Yes       | S       | OL              | USA          | 20         | 10/10        | 10/10            | 61.1 (11.5)     | 100              | CKD stage 2–4    | NR                           |
| <b>Sevelamer versus Ca-acetate</b>                       |                      |                |           |         |                 |              |            |              |                  |                 |                  |                  |                              |
| Barreto (2008) [41]                                      | 2 weeks              | 12 months      | No        | M       | OL              | Brazil       | 101        | 52/49        | 41/30            | 47 (13.3)       | 15/13            | HD >3 months     | ≥5.5                         |
| Bleyer (1999) [39]                                       | 2 weeks              | 8 weeks        | Yes       | M       | OL              | USA          | 83         | 83           | 80               | 54.5 (15)       | 29               | Stable HD        | ≥6                           |
| Block (2012) [49] <sup>b</sup>                           | 0 weeks              | 9 months       | No        | S       | DB <sup>c</sup> | USA          | 90         | 30/30        | 30/30            | 68 (11)         | 53/57            | CKD < stage 5D   | 10.8–18.6                    |
| Caglar (2008) [40]                                       | 2 weeks              | 8 weeks        | No        | S       | NR              | Turkey       | 50         | 25/25        | 25/25            | 40.4 (13.0)     | 0                | CKD stage 4      | ≥5.5                         |
| Evenepoel (2009) [42]                                    | 2 weeks              | 12 weeks       | No        | M       | OL              | Europe       | 143        | 97/46        | 74/30            | 54.4 (15.7)     | 20/26            | PD >6 months     | ≥5.5                         |
| Hervas (2003) [43]                                       | 2 weeks              | 34 weeks       | No        | NR      | NR              | Spain        | 51         | 18/22        | 18/22            | 60.4 (15.1)     | 15               | HD >3 months     | ≥6                           |
| Lin (2010) [44]                                          | 2 weeks              | 8 weeks        | No        | S       | OL              | Taiwan       | 52         | 26/26        | 23/20            | 57.3 (12.0)     | 42/27            | HD >3 months     | ≥5.5                         |
| Liu (2006) [71]                                          | 2 weeks              | 8 weeks        | No        | S       | OL              | Asian        | 73         | 37/36        | 33/30            | 48.9 (11.5)     | 8/15             | HD >3 months     | ≥6                           |
| Navarro-González (2011) [72]                             | 2–3 weeks            | 12 weeks       | No        | S       | OL              | Spain        | 65         | 33/32        | 30/29            | 61.2 (15.5)     | 43/41            | HD >3 months     | NR                           |
| Oliveira (2010) [45]                                     | 0 weeks              | 6 weeks        | No        | S       | OL              | Brazil       | 40         | 21/19        | 21/17            | 50.38 (11.4)    | 0                | CKD stage 3–4    | None                         |
| Qunibi (2008) [46]                                       | 6 weeks              | 12 months      | No        | M       | OL              | USA          | 203        | 100/103      | 70/59            | 59.4 (12.5)     | 57/57            | HD >3 months     | ≥5.5                         |
| Qunibi (2004) [47]                                       | 1–3 weeks            | 8 weeks        | No        | M       | DB              | USA          | 100        | 50/48        | 45/46            | 53.1 (14.0)     | NR               | HD >3 months     | ≥6                           |
| Yilmaz (2012) [48]                                       | 2 weeks              | 8 weeks        | No        | S       | OL              | Turkey       | 100        | 47/53        | 47/53            | 46 (median)     | 0                | CKD stage 4      | ≥6                           |
| <b>Sevelamer versus unspecified calcium-based binder</b> |                      |                |           |         |                 |              |            |              |                  |                 |                  |                  |                              |
| Block (2005) [51]                                        | 0 weeks              | 18 months      | No        | M       | OL              | USA          | 148        | 73/75        | 54/55            | 58.0 (15.0)     | 63/56            | New to HD        | None                         |
| Chertow (2002) [52]                                      | 2 weeks              | 12 months      | No        | M       | OL              | USA/Europe   | 200        | 99/101       | 81/88            | 56.5 (15.0)     | 32/33            | Stable HD        | ≥5.5                         |
| Suki (2007) [53]                                         | 0 weeks              | 36 months      | No        | M       | OL              | USA          | 2013       | 1053/1068    | 551/517          | 60.0 (14.7)     | 51/50            | HD >3 months     | None                         |
| <b>Sevelamer versus lanthanum</b>                        |                      |                |           |         |                 |              |            |              |                  |                 |                  |                  |                              |
| Block (2012) [49] <sup>b</sup>                           | 0 weeks              | 9 months       | No        | S       | DB <sup>c</sup> | USA          | 90         | 30/30        | 30/28            | 68 (11)         | 53/57            | CKD < stage 5D   | 10.8–18.6                    |
| Kasai (2012) [54]                                        | 9 weeks              | 13 weeks       | Yes       | S       | OL              | Japan        | 42         | 42           | 41               | 60.9 (11.9)     | 31               | HD >3 months     | NR                           |
| Sprague (2009) [55]                                      | 3 weeks              | 4 weeks        | Yes       | M       | OL              | Intl         | 182        | 86/95        | 60/59            | 55.5 (13.1)     |                  | HD >2 months     | ≥6                           |
| <b>Sevelamer versus magnesium carbonate</b>              |                      |                |           |         |                 |              |            |              |                  |                 |                  |                  |                              |
| de Francisco (2010) [50] <sup>d</sup>                    | 2–3 weeks            | 24 weeks       | No        | M       | OL              | Europe       | 255        | 129/126      | 99/105           | 57.6 (12.9)     | 20/25            | HD/HDF >3 months | ≥5.5                         |
| Zwisch (2011) [56]                                       | 2 weeks              | 12 weeks       | No        | S       | OL              | Poland       | 40         | 10/30        | 10/28            | 57.8 (13.6)     | NR               | HD >6 months     | ≥5.5                         |



sevelamer refers to sevelamer hydrochloride, unless otherwise specified. OL, open-label; DB, double-blind; SD, standard deviation; HD, hemodialysis; PD, peritoneal dialysis; HDF, hemodiafiltration; NDD-CKD, non-dialysis-dependent chronic kidney disease; NR, not reported.

Length of time (weeks) prior to randomization that current phosphate binders were removed.

Intervention is sevelamer carbonate.

No explanation of how this was successfully undertaken due to differences in taste and size as reported by others.

Comparator also includes calcium acetate.

Comparator is calcium acetate.

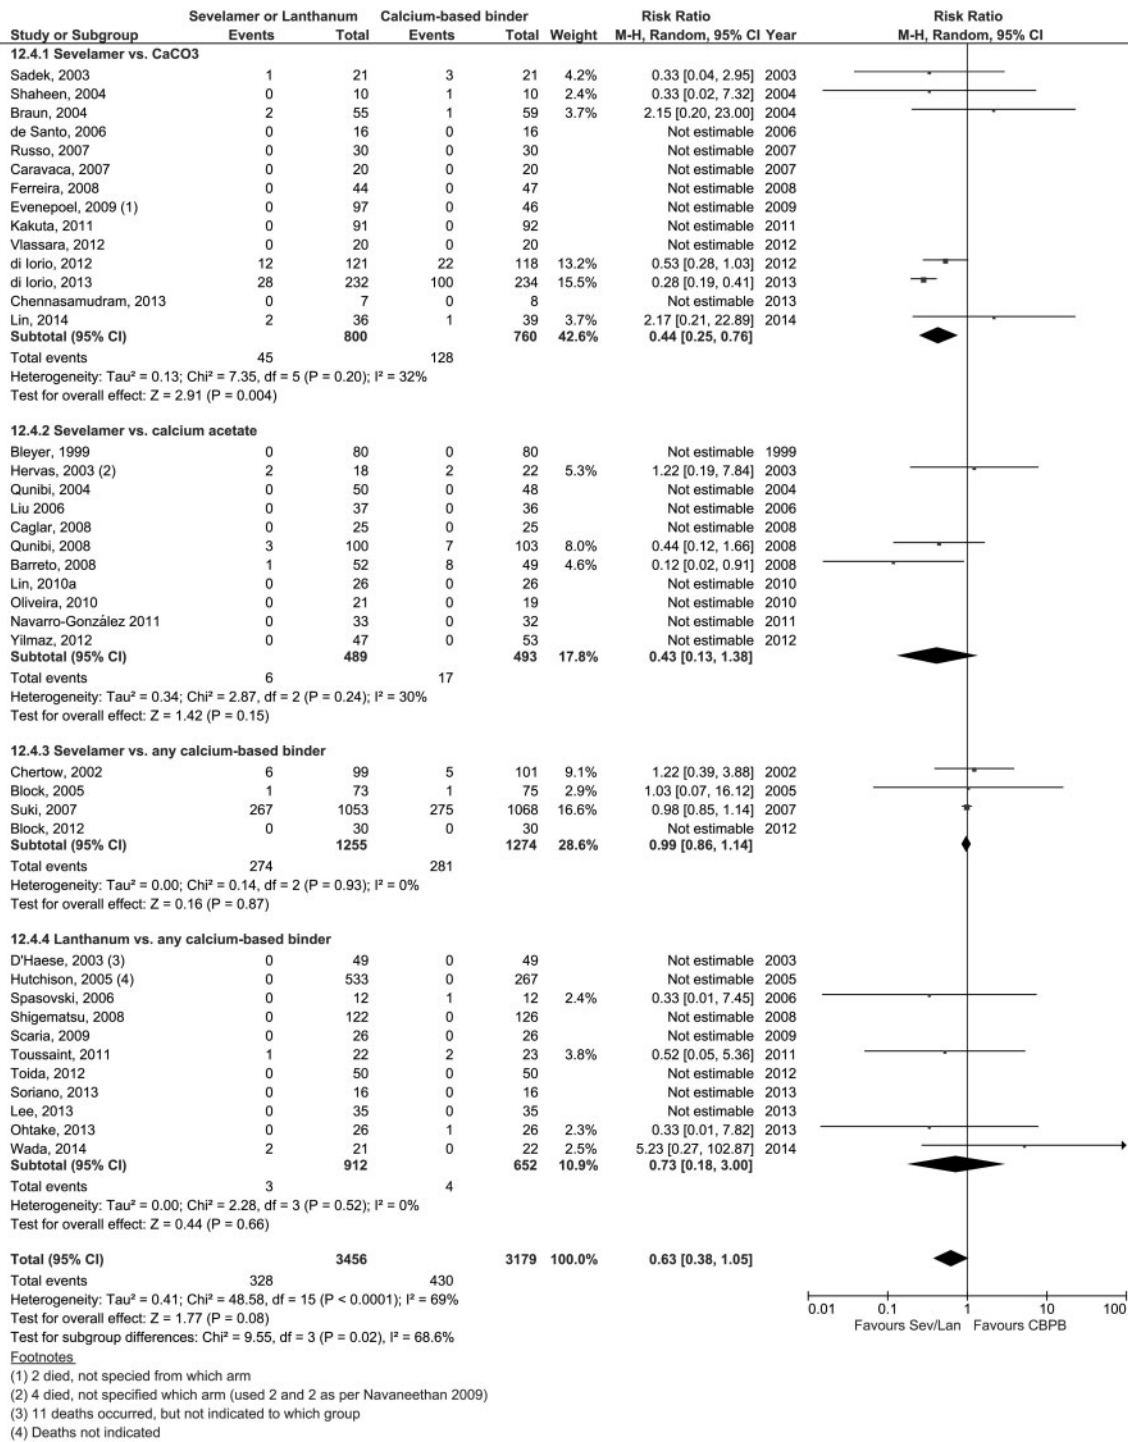

**FIGURE 2:** Forest plot comparing all-cause mortality over study duration between patients treated with sevelamer or lanthanum and CBPBs. (1) Two deaths were not specified to which arm, but pooled estimate was not sensitive to whether both deaths were assigned to either sevelamer [RR 0.64 (95% CI 0.37–1.11)] or CBPBs [RR 0.59 (95% CI 0.34–1.02)]. (2) Abstracted from Navaneethan *et al.* [16]. (3) Eleven deaths occurred, but not specified to which arm. (4) Deaths not reported.

CPPBs (245/499 events) [RR 0.50 (95% CI 0.31–0.81)]. The study that could not be pooled reported a hospitalization rate of 2.1 (SD 4.4) and 2.3 (SD 4.9) hospitalizations/patient-year among sevelamer and CBPBs, respectively (P = 0.06) [53]. The NNT to prevent hospitalization was 4 (95% CI 2–50) for 2 years and 4 (95% CI 3–5) for 3 years, suggesting that four patients would need to be

treated with sevelamer instead of CBPBs to prevent one additional hospitalization. Two studies reported longer length of stay among patients treated with CBPBs [52, 53]. Only two trials reported hospitalization rates for lanthanum (7/43 events) compared with CBPBs (9/45 events); a significant difference was not found [RR 0.80 (95% CI 0.34–1.93)] (Table 2).

Table 2. Summary of clinical and biochemical outcomes by phosphate binder

| Discrete outcomes                  | Sevelamer versus CBPBs |                  |                 |                        | Lanthanum versus CBPBs |                |                  |                 | P-value <sup>a</sup>   | Figure  |                      |            |
|------------------------------------|------------------------|------------------|-----------------|------------------------|------------------------|----------------|------------------|-----------------|------------------------|---------|----------------------|------------|
|                                    | N                      | n <sub>sev</sub> | n <sub>Ca</sub> | RR (95% CI)            | P-value                | N              | n <sub>lan</sub> | n <sub>Ca</sub> |                        |         | RR (95% CI)          | P-value    |
| All-cause mortality                | 12                     | 325/1870         | 426/1899        | 0.62 (0.35–1.08)       | 0.09                   | 4 <sup>b</sup> | 3/81             | 4/83            | 0.73 (0.18–3.00)       | 0.66    | Figure 2             |            |
| Cardiovascular deaths              | 3                      | 152/1337         | 232/1351        | 0.29 (0.05–1.82)       | 0.19                   | 0              | –                | –               | –                      | –       | –                    |            |
| Cardiovascular events <sup>c</sup> | 2                      | 7/91             | 8/98            | –                      | –                      | 4              | 11/592           | 8/328           | –                      | –       | –                    |            |
| Bone-related events                | 1                      | 1/1053           | 0/1068          | –                      | –                      | 1              | 0/22             | 0/23            | –                      | –       | –                    |            |
| Hospitalization rates              | 4                      | 113/493          | 245/499         | 0.50 (0.31–0.81)       | 0.005                  | 2              | 7/43             | 9/45            | 0.80 (0.34–1.93)       | 0.62    | Figure 5B            |            |
| Gastrointestinal events            | 18                     | 274/1406         | 215/1330        | 1.27 (0.97–1.66)       | 0.08                   | 8              | 381/834          | 155/575         | 1.74 (1.16–2.63)       | 0.008   | Figure 3             |            |
| Hypercalcemia                      | 18                     | 73/1562          | 282/1493        | 0.27 (0.17–0.42)       | <0.0001                | 7              | 13/797           | 126/38          | 0.12 (0.05–0.32)       | <0.0001 | Figure 4             |            |
| Pruritis                           | 4                      | 21/226           | 11/227          | 1.87 (0.93–3.77)       | 0.08                   | 0              | –                | –               | –                      | –       | Figure 5A            |            |
| Calciophylaxis                     | 1                      | 0/1053           | 3/1068          | –                      | –                      | 0              | –                | –               | –                      | –       | –                    |            |
| Hyperchloremic acidosis            | 1                      | 0/30             | 1/30            | –                      | –                      | 1              | 1/28             | 1/30            | –                      | –       | –                    |            |
| Participant attrition              | 23                     | 736/2594         | 804/2572        | 0.91 (0.85–0.99)       | 0.02                   | 11             | 142/892          | 103/634         | 1.19 (0.75–1.88)       | 0.46    | Supplement           |            |
| Continuous outcomes                | N                      | n <sub>sev</sub> | n <sub>Ca</sub> | MD (95% CI)            | P-value                | N              | n <sub>lan</sub> | n <sub>Ca</sub> | MD (95% CI)            | P-value | P-value <sup>a</sup> | Figure     |
| Phosphorus (mg/dL)                 | 30                     | 2178             | 2133            | –0.01 (–0.16–0.14)     | 0.92                   | 12             | 581              | 500             | 0.18 (0.10–0.27)       | <0.0001 | 0.03                 | Supplement |
| Calcium (mg/dL)                    | 28                     | 2078             | 2055            | –0.35 (–0.49 to –0.22) | <0.0001                | 12             | 579              | 499             | –0.26 (–0.46 to –0.07) | 0.009   | 0.47                 | Supplement |
| LDL (mg/dL)                        | 18                     | 974              | 979             | –20.9 (–23.3 to –18.6) | <0.0001                | 2              | 47               | 53              | –2.20 (–11.19–6.79)    | 0.63    | <0.0001              | Supplement |
| iPTH (pg/mL)                       | 17                     | 634              | 634             | 39.0 (7.74–70.3)       | 0.01                   | 8              | 276              | 294             | 63.3 (11.5–115)        | 0.02    | 0.43                 | Supplement |
| CAC score                          | 8                      | 412              | 383             | –101 (–160 to –41.7)   | 0.0008                 | 1              | 19               | 23              | –56.5 (–1308–1195)     | 0.93    | –                    | Supplement |

CBPB, calcium-based phosphate binder; RR, risk ratio; MD, mean difference; CI, confidence interval; LDL, low-density lipoprotein; iPTH, intact parathyroid hormone; CAC, coronary artery calcification; n, number of events/total number for dichotomous outcomes and number of measurements for continuous outcomes among participants treated with sevelamer (n<sub>sev</sub>), CBPB (n<sub>Ca</sub>) and lanthanum carbonate (n<sub>lan</sub>); N, number of studies.

<sup>a</sup>P-value for heterogeneity for subgroups of sevelamer and lanthanum trials.

<sup>b</sup>One study reported 11 deaths out of 98 randomized patients but did not specify which arm.

<sup>c</sup>Nature of event not specified or differed between studies.

Table 3. Selected subgroup analyses for end-of-study serum phosphorus and intact parathyroid hormone

| Subset (sevelamer only)           | Number of studies | Number of patients |                      | Heterogeneity ( $I^2$ , P-value) | RR or MD (95% CI)      | P-value | Test for interaction <sup>a</sup> ( $I^2$ , P-value) |
|-----------------------------------|-------------------|--------------------|----------------------|----------------------------------|------------------------|---------|------------------------------------------------------|
|                                   |                   | Sevelamer          | Calcium-based binder |                                  |                        |         |                                                      |
| All-cause mortality               |                   |                    |                      |                                  |                        |         |                                                      |
| All studies                       | 12                | 325/1870           | 426/1899             | 75%, <0.0001                     | 0.62 (0.35–1.08)       | 0.09    | –                                                    |
| Comparator                        |                   |                    |                      |                                  |                        |         | 79%, 0.009                                           |
| CaCO <sub>3</sub>                 | 6                 | 45/475             | 128/481              | 32%, 0.20                        | 0.44 (0.25–0.76)       | 0.004   |                                                      |
| Calcium acetate                   | 3                 | 6/170              | 17/174               | 30%, 0.24                        | 0.43 (0.13–1.38)       | 0.15    |                                                      |
| Any CBPB                          | 3                 | 274/1225           | 281/1244             | 0%, 0.93                         | 0.99 (0.86–1.14)       | 0.87    |                                                      |
| Dialysis status                   |                   |                    |                      |                                  |                        |         | 94%, <0.0001                                         |
| Chronic HD                        | 9                 | 284/1444           | 303/1472             | 0%, 0.43                         | 0.96 (0.82–1.13)       | 0.66    |                                                      |
| Incident HD                       | 2                 | 29/305             | 101/309              | 0%, 0.36                         | 0.29 (0.20–0.42)       | <0.0001 |                                                      |
| Chronic PD                        | 0                 | –                  | –                    | –                                | –                      | –       |                                                      |
| NDD-CKD                           | 1                 | 12/314             | 22/315               | –                                | 0.53 (0.28–1.03)       | 0.06    |                                                      |
| Study follow-up                   |                   |                    |                      |                                  |                        |         | 0%, 0.67                                             |
| <6 months                         | 2                 | 1/71               | 3/69                 | 0%, 1.00                         | 0.33 (0.06–1.98)       | 0.23    |                                                      |
| 6 to <12 months                   | 2                 | 4/54               | 3/61                 | 0%, 0.71                         | 1.52 (0.35–6.55)       | 0.57    |                                                      |
| 12 to <24 months                  | 4                 | 11/324             | 21/328               | 32%, 0.22                        | 0.56 (0.21–1.52)       | 0.26    |                                                      |
| ≥24 months                        | 4                 | 309/1461           | 398/1479             | 92%, <0.0001                     | 0.61 (0.26–1.43)       | 0.25    |                                                      |
| Phosphorus, mg/dL                 |                   |                    |                      |                                  |                        |         |                                                      |
| Dialysis status                   |                   |                    |                      |                                  |                        |         | 83%, 0.0005                                          |
| Chronic HD                        | 2618              | 20 141 517         | 19 271 523           | 3145%, 0.02                      | 0.21 (–0.60–0.84)      | 0.01    |                                                      |
| Incident HD                       | 2                 | 253                | 253                  | 82%, 0.02                        | –0.43 (–0.72 to –0.15) | 0.002   |                                                      |
| Chronic PD                        | 2                 | 110                | 59                   | 82%, 0.02                        | –0.28 (–1.06–0.49)     | 0.47    |                                                      |
| NDD-CKD                           | 108               | 334 298            | 334 298              | 8273%, 0.0006                    | –0.22 (–0.54–0.10)     | 0.17    |                                                      |
| Ethnicity                         |                   |                    |                      |                                  |                        |         | 0%, 0.79                                             |
| White                             | 220               | 211 843            | 20 071 800           | 8381%, <0.0001                   | 0.04 (–0.14–0.22)      | 0.69    |                                                      |
| Asian                             | 15                | 419 177            | 450 187              | 339%, 0.13                       | –0.08 (–0.42–0.27)     | 0.67    |                                                      |
| Other                             | 5                 | 158                | 146                  | 86%, <0.0001                     | –0.11 (–0.69–0.48)     | 0.72    |                                                      |
| Dosing modality                   |                   |                    |                      |                                  |                        |         | 0%, 0.33                                             |
| Fixed                             | 3525              | 262 089            | 24 692 049           | 80%, <0.0001                     | 0.03 (–0.11–0.16)      | 0.73    |                                                      |
| Variable                          | 5                 | 129 109            | 134 114              | 0%, 0.93                         | 0.14 (–0.14–0.16)      | 0.026   |                                                      |
| Intact parathyroid hormone, pg/mL |                   |                    |                      |                                  |                        |         |                                                      |
| Dialysis status                   |                   |                    |                      |                                  |                        |         | 48%, 0.12                                            |
| Chronic HD                        | 1612              | 666 466            | 665 461              | 6574%, <0.0001                   | 51.9 (6.67–97.0)       | 0.02    |                                                      |
| Incident HD                       | 1                 | 54                 | 55                   | –                                | 54.3 (0.68–108)        | –       |                                                      |
| Chronic PD                        | 1                 | 15                 | 15                   | –                                | 58.6 (33.9–83.3)       | –       |                                                      |
| NDD-CKD                           | 43                | 11 599             | 119 103              | 5164%, 0.06                      | –5.43 (–52.4–41.5)     | 0.82    |                                                      |
| Ethnicity                         |                   |                    |                      |                                  |                        |         | 0%, 0.56                                             |
| White                             | 1512              | 481 426            | 480 429              | 881%, <0.0001                    | 40.4 (2.28–78.5)       | 0.04    |                                                      |
| Asian                             | 62                | 304 134            | 325 134              | 190%, 0.51                       | 55.6 7.29 (–50.2–64.8) | 0.8     |                                                      |
| Other                             | 3                 | 107                | 101                  | 79%, 0.008                       | 57.9 (–38.6–154)       | 0.24    |                                                      |

MD, mean difference; CI, confidence interval; iPTH, intact parathyroid hormone; hemodialysis (HD) and peritoneal dialysis (PD) studies were restricted to >2 months of dialysis; NDD-CKD, non-dialysis-dependent chronic kidney disease; N, number of studies with events or poolable data; CBPB, calcium-based phosphate binder.

<sup>a</sup>Test for subgroup differences using Higgin's  $I^2$  and Cochrane's Q (P-value).

### Adverse events (gastrointestinal events, hypercalcemia, pruritis, calciphylaxis)

Gastrointestinal problems (i.e. vomiting, diarrhea, constipation, abdominal pain, flatulence) were the most common complaints reported. The incidence of gastrointestinal adverse events did not differ between sevelamer (274/1406 events) and CBPBs (215/1330 events) [RR 1.27 (95% CI 0.97–1.66)], but was significantly higher for patients receiving lanthanum (381/834 events) than CBPBs (155/575 events) [RR 1.74 (95% CI 1.16–2.63)] (Figure 3). There was evidence of publication bias ( $P = 0.03$ ; Supplementary data, Figure S2B). Beta-binomial estimates were  $RR = 1.27$  (95% CI 0.72–2.24) for sevelamer,  $RR = 3.02$  (95% CI 1.03–8.81) for lanthanum and  $RR 1.61$  (95% CI 0.97–2.65) combined.

Hypercalcemic events were less likely for patients treated with sevelamer (73/1562 events) versus CBPBs (282/1493

events) [RR 0.27 (95% CI 0.17–0.42)]. Similarly, hypercalcemic events were decreased with lanthanum (13/797 events) versus CBPBs (126/538 events) [RR 0.12 (95% CI 0.05–0.32)] (Figure 4). There was no difference by the choice of calcium-free binder ( $P = 0.15$ ; Table 2). Funnel plot analysis was suggestive of publication bias [ $P = 0.08$  for Egger's test (Supplementary data, Figure S2C)]. Combined beta-binomial analysis was  $RR = 0.33$  (95% CI 0.19–0.59).

Pruritis was reported in seven trials, with a higher risk with sevelamer (21/226 events) compared with CBPBs (11/227 events) [RR 1.87 (95% CI 0.93–3.77)] (Figure 5A). Reporting was too sparse to reliably include double-zero studies. Calciphylaxis developed in three CBPB patients [53]. Hyperchloremic acidosis was reported in one study participant receiving CBPB and one receiving lanthanum [49].



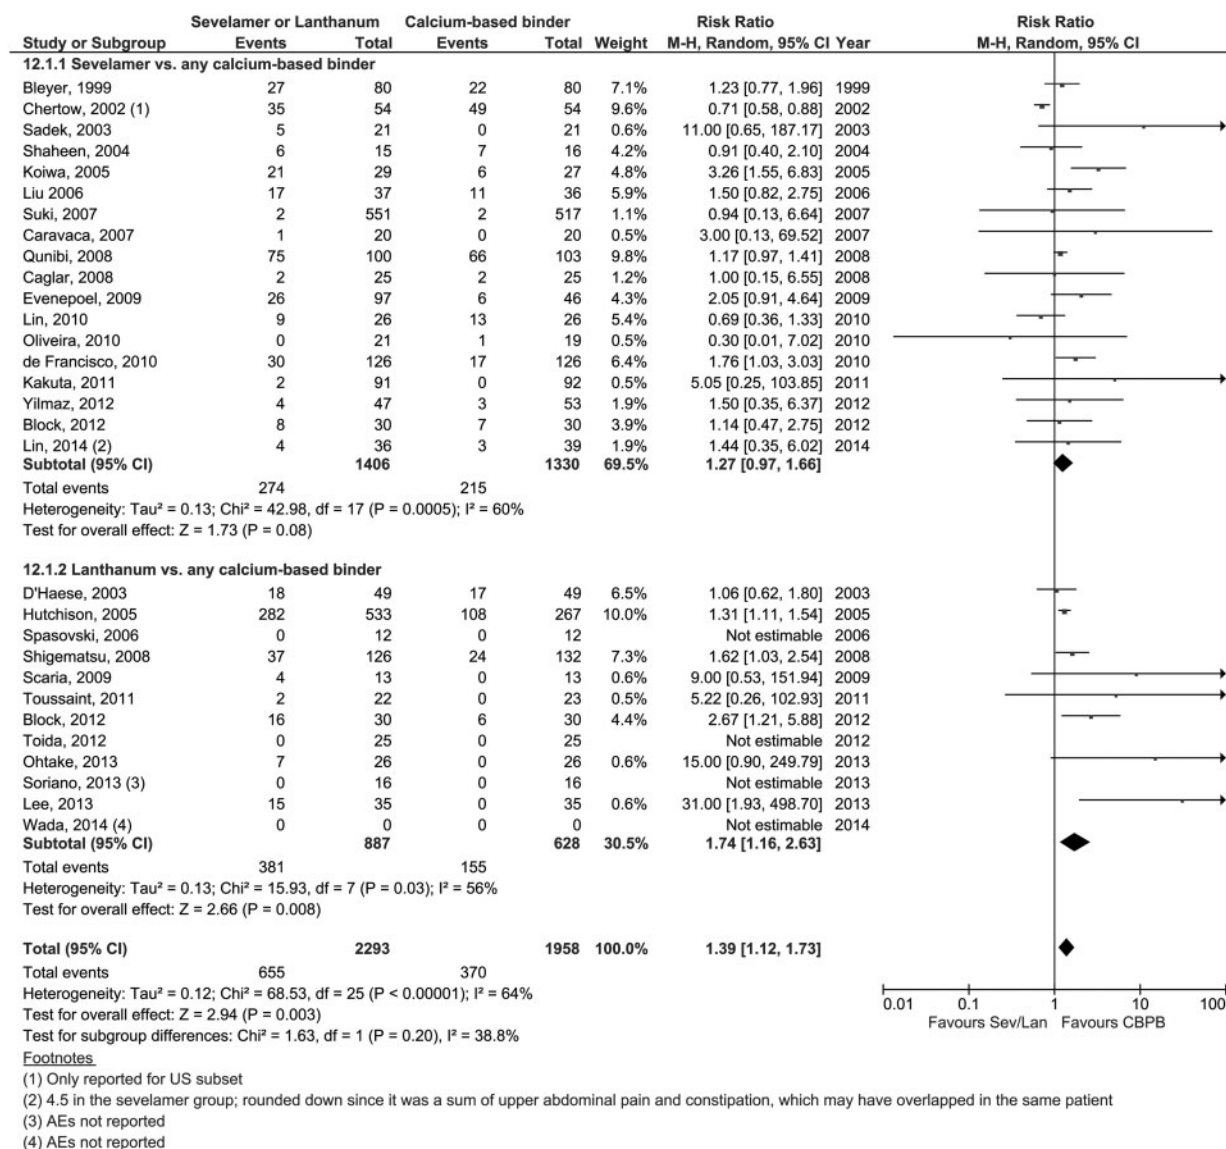

**FIGURE 3:** Forest plot comparing gastrointestinal adverse event rates over the study duration between patients treated with sevelamer or lanthanum (Sev/Lan) and calcium-based phosphate binders (CBPB). AE - adverse event.

### Loss to follow-up

Fewer patients receiving sevelamer than CBPBs were lost to follow-up (736/2594 versus 804/2572) [RR 0.91 (95% CI 0.85–0.99)] but not lanthanum (142/908) versus CBPBs (103/650) [RR 1.19 (95% CI 0.75–1.88)] (Supplementary data, Figure S3). Using beta-binomial methods, the risk of attrition was RR = 0.95 (95% CI 0.61–1.47) for sevelamer, RR = 1.41 (95% CI 0.74–2.69) for lanthanum and RR = 1.07 (95% CI 0.75–1.54) combined.

### Serum phosphorus

Meta-analyses of end-of-study biochemical parameters are presented in the Supplementary figures and summarized in Table 2. Sevelamer reduced serum phosphorus ( $n = 2178$ ) to a similar extent to CBPBs ( $n = 2133$ ) [MD  $-0.01$  (95% CI  $-0.16$ – $0.14$ )], irrespective of the type of CBPB used (Supplementary data, Figure S3). Lanthanum ( $n = 581$ )

provided slightly less effective phosphate reduction than CBPBs ( $n = 500$ ) [MD  $0.18$  (95% CI  $0.10$ – $0.27$ )]. No evidence of publication bias was found [Egger's  $P = 0.15$  (Supplementary data, Figure S2D)].

The heterogeneity observed among sevelamer trials was not explained by the type of CBPB used as the comparator ( $P = 0.85$ ), ethnicity ( $P = 0.79$ ) or dosage strategy ( $P = 0.33$ ) (Table 3). A significant difference was found in subgroup analysis by dialysis modality ( $P = 0.0005$ ), whereby sevelamer was less effective than CBPBs in chronic HD patients.

### Serum calcium

Lower end-of-study serum calcium was observed with sevelamer ( $n = 2078$ ) versus CBPBs ( $n = 2055$ ) [MD  $-0.35$  (95% CI  $-0.50$  to  $-0.21$ )] and lanthanum ( $n = 579$ ) [MD  $-0.26$  (95% CI  $-0.46$  to  $-0.07$ )] versus CBPBs ( $n = 499$ ). Despite significant heterogeneity between studies ( $I^2 = 88\%$ ), results were

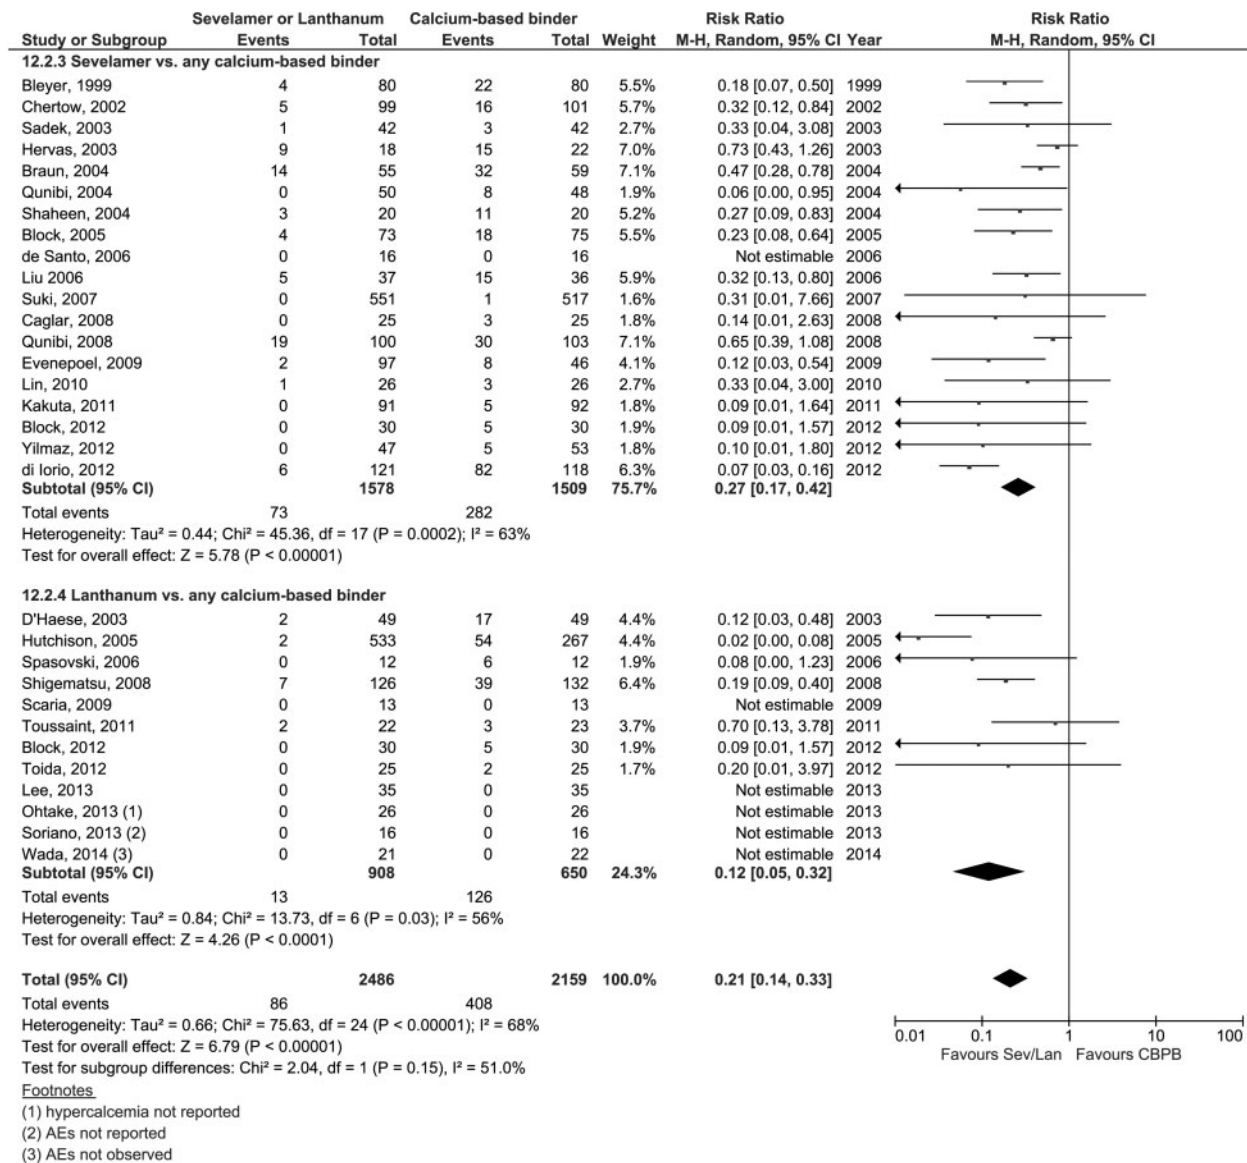

**FIGURE 4:** Forest plot comparing hypercalcemia event rates over the study duration between patients treated with sevelamer or lanthanum (Sev/Lan) and calcium-based phosphate binders (CBPB). AE - adverse event.

consistently in the same direction across all studies (Supplementary data, Figure S4).

### Low-density lipoprotein

Sevelamer use ( $n = 974$ ) was associated with significantly lower LDL levels by 20.9 (95% CI 18.6–23.3) mg/dL compared with CBPBs ( $n = 979$ ) (Supplementary data, Figure S5). Although there was significant heterogeneity between studies ( $I^2 = 69\%$ ), all point estimates were in favor of sevelamer, except one non-significant report [36]. Similar reductions were not observed with lanthanum ( $n = 47$ ) versus CBPBs ( $n = 53$ ), although only two studies provided data on LDL (Table 2).

### Intact parathyroid hormone

Sevelamer ( $n = 634$ ) and lanthanum ( $n = 276$ ) were both associated with significantly higher iPTH levels: MD 43.5 (95% CI 11.1–75.9) pg/mL,  $n = 634$  and MD 63.3 (95% CI 11.5–115)

pg/mL,  $n = 294$ , respectively (Supplementary data, Figure S6). Differences were not observed in subgroup analyses (Table 3). Three studies that measured end-of-study iPTH levels in NDD-CKD patients could not be pooled since results were presented as medians, but all three trials reported lower end-of-study iPTH with sevelamer. We did not observe subgroup differences by the type of CBPB used as a comparator, ethnicity or dosing regimen.

### Coronary artery calcification

By the end of the study, CAC was significantly lower among sevelamer-treated patients ( $n = 412$ ) compared with CBPBs ( $n = 383$ ) [MD  $-101$  (95% CI  $-160$  to  $-41.7$ )]. Heterogeneity between studies was observed ( $I^2 = 74\%$ ), but all estimates were in the same direction. Among the two studies whose data could not be pooled, the increase in CAC was also higher among CBPB-treated patients [29, 49]. Only one study reported CAC

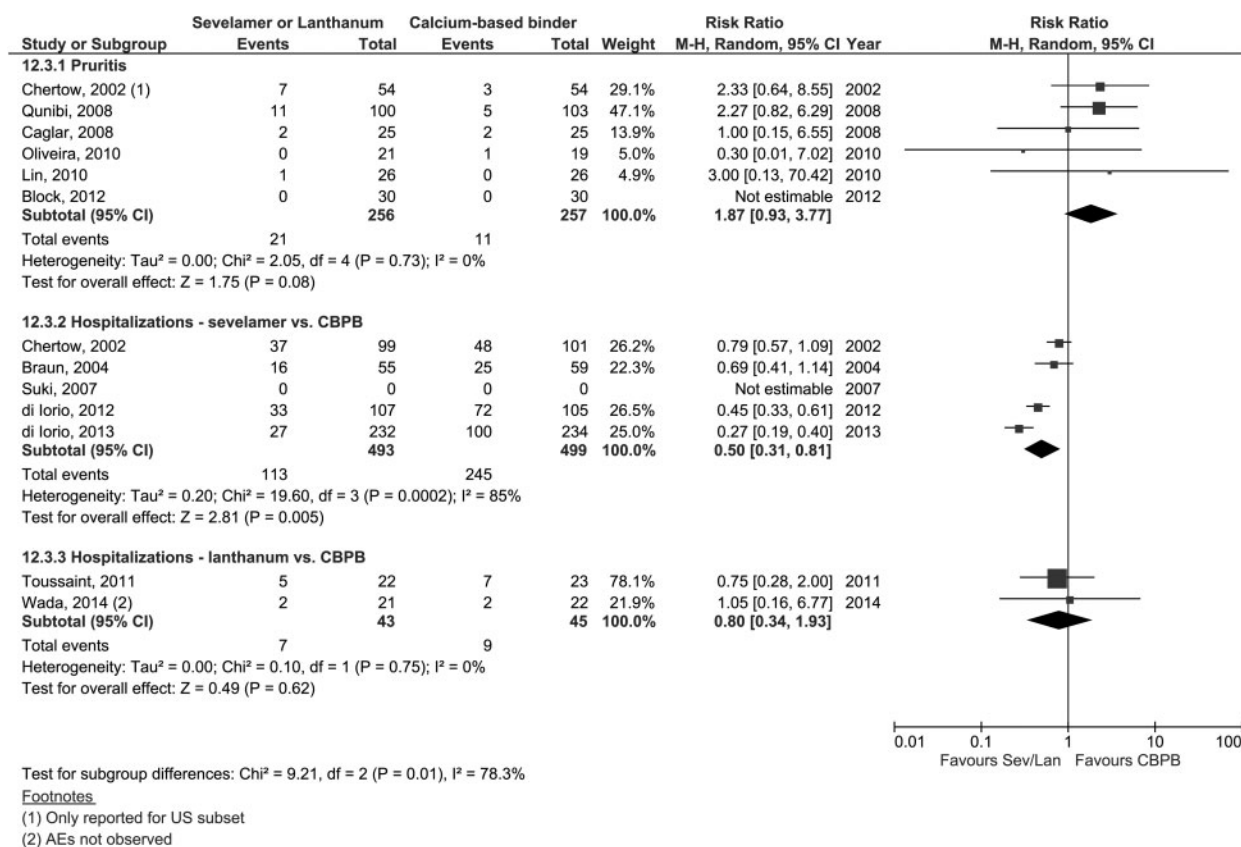

**FIGURE 5:** Forest plot comparing hospitalization events and pruritis events over the study duration between patients treated with sevelamer or lanthanum (Sev/Lan) and calcium-based phosphate binders (CBPB). AE - adverse event; US - United States.

following lanthanum treatment, but conclusions were drawn from a subgroup analysis ( $n = 21$ ) [63].

### Head-to-head comparisons for noncalcium binders

Sevelamer hydrochloride was compared with sevelamer carbonate in three head-to-head trials ( $n = 207$ ): no differences were observed for end-of-study serum phosphorus, serum calcium or LDL, but no study reported on hyperchloremic acidosis (primary motivator for introducing sevelamer carbonate) [57–59]. Two trials ( $n = 295$ ) comparing sevelamer hydrochloride with magnesium carbonate obtained conflicting results on end-of-study phosphorus levels, although no difference in serum calcium was observed [50, 56]. Three studies compared sevelamer directly with lanthanum carbonate ( $n = 314$  patients): similar end-of-study phosphorus and calcium levels were observed, but sevelamer was associated with lower LDL [MD  $-20.9$  (95% CI  $-29.9$  to  $-11.9$ ) mg/dL] [49, 54, 55].

Sevelamer was compared with iron-based binders in three studies ( $n = 1492$ ) (Supplementary data, Figure S9) [73–75]. All-cause mortality [RR 1.07 (95% CI 0.38–2.99),  $I^2 = 0\%$ ], patient attrition [RR 1.03 (95% CI 0.49–2.13),  $I^2 = 83\%$ ] and incidence of gastrointestinal adverse events [RR 1.30 (95% CI 0.61–2.78),  $I^2 = 96\%$ ] were similar. Similar end-of-study phosphate [MD 0.07 (95% CI  $-0.42$ – $0.56$ ) mg/dL,  $n = 1206$ ], calcium [MD  $-0.03$  (95% CI  $-0.12$ – $0.05$ ) mg/dL,  $n = 398$ ] and iPTH (only medians reported) were observed. Hypercalcemic events and hospitalization rates were not reported.

### Meta-regression of relationship between biochemical parameters and mortality risk

The RR of mortality across studies was not associated with trial duration ( $P = 0.52$ ) or the proportion of patients lost to follow-up in the intervention arm ( $P = 0.18$ ) or CBPB arm ( $P = 0.26$ ). A greater reduction in mortality risk was observed among studies with a greater reduction in end-of-study calcium ( $P < 0.0001$ ), but not phosphorus ( $P = 0.27$ ), LDL ( $P = 0.51$ ) or CAC ( $P = 0.10$ ) (Supplementary data, Figure S8).

## DISCUSSION

When all available randomized evidence is considered, very few clinically relevant advantages have been proven for any particular phosphate binder. Confidence in any significant differences found is eroded by the shortcomings in the existing evidence base (lack of reporting clinically important outcomes, lack of blinding, selective reporting, publication bias and significant loss to follow-up). Despite >51 randomized trials of phosphate binders, there are few definitive answers, largely because the majority of the studies were focused on surrogate (biochemical) outcomes and not designed to study clinically relevant outcomes. In fact, few of the studies reported on the very reason that phosphate binders are given to patients with CKD: to prevent clinically important adverse events that (theoretically) may be due to hyperphosphatemia, such as bone events (bone



deformity, fractures), cardiac events and ultimately all-cause mortality and overall quality of life.

The most contentious finding is whether sevelamer reduces the risk of all-cause mortality compared with CBPBs. In our meta-analysis, we found that the RR for all-cause mortality for sevelamer versus CBPBs was 0.62 (95% CI 0.35–1.08). The CIs show results that are compatible with both a 65% reduction and an 8% increase in the risk of death. As a result, the conclusions cannot be definitive about whether sevelamer reduces, has no impact or increases the risk of death. Our conclusions regarding mortality agree with some recent meta-analyses [82] and contrast with others that purport to show that sevelamer significantly reduces the risk of all-cause mortality [13, 16, 17]. We explore these reasons next.

We used imputation and digitization to include data from more trials than previous meta-analyses [13, 16, 17]. The most recent systematic review [14] obtained a risk for all-cause mortality of RR = 0.54 (95% CI 0.32–0.93) from 13 studies, which we believe is optimistic. Deaths were not reported in 4 of these studies [30, 38, 39, 47] (so only 9/13 studies contributed to the RR estimate). Moreover, we identified three additional studies [25, 32, 34] that were not included in previous reviews [14, 83]. By including more trial data, our numerical results are less biased and more representative of the evidence base than other recent reviews [13, 14, 83]. Differences in how the treatment of observational studies (or observational periods postrandomization) was considered may explain some of the numerical differences between meta-analyses. For example, the mortality risk of RR = 0.53 (95% CI 0.28–1.03) in favor of sevelamer from the study by Block *et al.* [51, 84] was based on continued observation of patients who were no longer on assigned treatment for up to 3 years, a period we omitted [84]. We also conduct a sensitivity analysis to exclude the sevelamer trial whose loss to follow-up renders the comparability of the groups questionable [52]. Finally, a recent network meta-analysis [83] incidentally included a non-randomized trial (Takei, 2008) [85].

Numerical differences may also be due to data abstraction decisions based on intention to treat: Di Lorio *et al.* [28] randomized 239 patients, but 212 were used as the denominator by both prior reviews [13, 14]. To further account for potential bias, secondary analyses trials with double-zero counts were included because data from trials reporting zero deaths are not uninformative (they suggest that mortality is infrequent and is similar between treatments) [23]. Excluding double-zero trials may overestimate treatment effects. Also, pooling of sparse-event studies using this methodology negates concern about the continuity correction. Since fewer lanthanum trials reported mortality and trials were generally small, there was a large proportion of trials with very few deaths, leading to spuriously high RR estimates due to the continuity correction [i.e. RR 5.23 (95% CI 0.27–103) for Wada and Wada [63] in Figure 3]. Finally, our meta-analysis was investigator driven, which may provide less bias than perspectives from industry-sponsored syntheses [86].

Much of the apparent ‘controversy’ between meta-analyses can be resolved through a more rational understanding of the numbers rather than overinterpretation of P-values as bluntly indicating ‘significant’ versus not significant at the magical threshold of  $P = 0.05$ . In fact, interpreting the effect size and the

CIs should be the focus rather than the P-value. The most clinically useful interpretation is likely through NNT. When we consider the absolute difference in mortality between sevelamer and CBPBs with the RR = 0.65 (nntonline.net), NNT = 16, suggesting that on average a total 16 patients would need to be treated chronically with sevelamer instead of CBPBs for up to 3 years in order to prevent one death. This is likely an underestimate since NNT=35 if RR=0.85 (beta-binomial estimate) is used. This NNT estimate would be similar across all meta-analyses, but the CIs around NNT would differ (ranging from benefit to harm in our analysis). Thus, we can conclude that sevelamer might provide a reduced risk of death, though at best this difference applies to an average of only 1/16 patients treated with the drug. The other 15 patients would have similar survival regardless of which phosphate binder they used. Furthermore, the confidence in this effect estimate for sevelamer on mortality is sensitive to inclusion of the largest trial (yet most biased due to large loss to follow-up). Finally, it is important to consider that only three studies drive most of this potential difference in mortality. As a result of these limitations, the evidence base does not allow us to be more definitive than this; the loss to follow-up across the most pivotal trials makes any attempt at definitive conclusions suspect.

Patients receiving sevelamer (but not lanthanum) were less likely to drop out by the trials’ end date. The reasons for differential attrition are likely mixed (i.e. due to the open-label nature of most studies, the effect of adverse events or side effects, pill burden), making conclusions difficult to draw. Other outcomes that were significantly improved with sevelamer versus CBPBs included fewer hospitalizations and hypercalcemic events. However, other important outcomes (bone fractures, cardiac events, calciphylaxis, surgeries and overall quality of life) remain largely unstudied. Sevelamer and lanthanum were associated with a higher risk of gastrointestinal events but lower risk of hypercalcemia (and lower serum calcium) compared with CBPBs. Another limitation is the paucity of reporting on hyperchloremic acidosis in head-to-head trials of sevelamer hydrochloride with sevelamer carbonate, lanthanum or iron-based binders—the very basis for the attempt to supplant sevelamer hydrochloride. If calcium-free phosphate binders are indeed the future of phosphate binder treatment [87], trials should focus on the relevant outcomes attributable to the specific binders to determine whether their balance of benefits and risks is worthy of supplanting the cheaper CBPBs. If randomized trials are unable to provide data that require long-term follow-up (particularly for rare outcomes like calciphylaxis [88] or long-term effects of lanthanum storage in the body [11]), methodologically sound large-scale observational studies may help fill this gap.

Sevelamer was as effective as CBPBs at reducing serum phosphorus, while lanthanum was less effective. Sevelamer also had significantly greater reductions in LDL, serum calcium, and CAC than CBPBs, and increased iPTH. However, the clinical relevance of these differences is unknown. Lanthanum generally did not have significant effects on these biochemical parameters. Results from observational studies suggest that mortality is elevated with higher serum phosphorus, LDL and calcification scores in a dose-dependent manner [89–92]. However, as is often the case with surrogate outcomes, these effects may not translate to better clinical outcomes [90, 93–96]. Although the relationship between



lower serum calcium and survival is supported by our meta-regression, this is hypothesis-generating only and needs to be the focus of clinical trials designed to test the relationship prospectively. Furthermore, studies provided short-term follow-up (maximum 3 years), which reduces our confidence in adequately studying relationships between biochemical parameters and risk of death. Our meta-regressions did not show a relationship with other biochemical parameters, including phosphate, LDL and CAC, and risk of mortality.

Most trials employed treat-to-target methodology, whereby the dose of the phosphate binder could be adjusted throughout the study. Although the recommended phosphate target of 3.5–5.5 mg/dL established by the Kidney Disease: Improving Global Outcomes guideline [97] was often used, some studies aimed as low as 2.5 mg/dL [34, 39] or as high as 6.5 mg/dL [51]. Given such differences in methodology, a random effects model was used to calculate pooled estimates. One limitation to pooling data may arise due to differences in how results are presented. Phosphorus control may be more appropriately measured as a time-weighted average to reflect the differences between groups over the entire course of follow-up. End-of-study phosphorus levels may not be representative of the general trends, as was the case with Lin *et al.* [44]. The extent to which these different measurement strategies impact conclusions depends on the temporal variation in phosphorus control throughout the study.

In conclusion, in this comprehensive update on the efficacy and safety of calcium-free binders compared with cheaper alternatives (i.e. CBPBs), sevelamer was associated with lower hospitalization rates, lower rates of hypercalcemia and a nonsignificant reduction in mortality. However, differences in some of the most important outcomes (cardiac events, fractures, calciphylaxis, hyperchloremic acidosis and health-related quality of life) remain unstudied. While sevelamer resulted in favorable biochemical outcomes, the importance of these surrogate outcomes remains unknown due to a lack of follow-up for associated clinically relevant outcomes. Future randomized trials should be of adequate power and duration to measure clinically important outcomes (the reason why phosphate binders are prescribed in the first place). Future studies that fail to address these outcomes will be wasteful.

## ETHICS APPROVAL

This is a secondary analysis of publicly available data. No ethical approval was required.

## SUPPLEMENTARY DATA

Supplementary data are available online at <http://ndt.oxfordjournals.org>.

## ACKNOWLEDGEMENTS

Dr Amit X Garg was supported by the Dr Adam Linton Chair in Kidney Health Analytics. S.H., S.P. and R.A. were supported by the Lilibeth Caberto Kidney Clinical Research Unit.

## CONFLICT OF INTEREST STATEMENT

The authors have no conflicts of interest to disclose.

(See related article by Elder. Calcium-based phosphate binders; down, but not out. *Nephrol Dial Transplant* 2017; 32: 5–8)

## REFERENCES

- Verhave JC, Troyanov S, Mongeau F *et al.* Prevalence, awareness, and management of CKD and cardiovascular risk factors in publicly funded health care. *Clin J Am Soc Nephrol* 2014; 9: 713–719
- Neovius M, Jacobson SH, Eriksson JK *et al.* Mortality in chronic kidney disease and renal replacement therapy: a population-based cohort study. *BMJ Open* 2014; 4: e004251
- Tonelli M, Wiebe N, Culleton B *et al.* Chronic kidney disease and mortality risk: a systematic review. *J Am Soc Nephrol* 2006; 17: 2034–2047
- Russo D, Palmiero G, de Blasio AP *et al.* Coronary artery calcification in patients with CRF not undergoing dialysis. *Am J Kidney Dis* 2004; 44: 1024–1030
- Kazama JJ, Matsuo K, Iwasaki Y *et al.* Chronic kidney disease and bone metabolism. *J Bone Miner Metab* 2015; 33: 245–252
- Martin K, González E. Metabolic bone disease in chronic kidney disease. *J Am Soc Nephrol* 2007; 18: 875–885
- Seifert ME, Hruska KA. The kidney-vascular-bone axis in the chronic kidney disease-mineral bone disorder. *Transplantation* 2016; 100: 497–505
- Locatelli F, Del Vecchio L, Violo L *et al.* Phosphate binders for the treatment of hyperphosphatemia in chronic kidney disease patients on dialysis: a comparison of safety profiles. *Expert Opin Drug Saf* 2014; 13: 551–561
- Chapter 3: Management of progression and complications of CKD. *Kidney Int Suppl* 2013; 3: 73–90
- Oka Y, Miyazaki M, Takatsu S *et al.* Sevelamer hydrochloride exacerbates metabolic acidosis in hemodialysis patients, depending on the dosage. *Ther Apher Dial* 2007; 11: 107–113
- Floege J. Phosphate binders in chronic kidney disease: a systematic review of recent data. *J Nephrol* 2016; 29: 329–340
- Palmer SC, Craig JC, Strippoli GF. Sevelamer: a promising but unproven drug. *Nephrol Dial Transplant* 2007; 22: 2742–2745
- Jamal S, Vandermeer B, Raggi P *et al.* Effect of calcium-based versus non-calcium-based phosphate binders on mortality in patients with chronic kidney disease: an updated systematic review and meta-analysis. *Lancet* 2013; 382: 1268–1277
- Patel L, Bernard LM, Elder GJ. Sevelamer versus calcium-based binders for treatment of hyperphosphatemia in CKD: a meta-analysis of randomized controlled trials. *Clin J Am Soc Nephrol* 2016; 11: 232–244
- Zhai CJ, Yang XW, Sun J *et al.* Efficacy and safety of lanthanum carbonate versus calcium-based phosphate binders in patients with chronic kidney disease: a systematic review and meta-analysis. *Int Urol Nephrol* 2015; 47: 527–535
- Navaneethan SD, Palmer SC, Craig JC *et al.* Benefits and harms of phosphate binders in CKD: a systematic review of randomized controlled trials. *Am J Kidney Dis* 2009; 54: 619–637
- Zhang Q, Li M, Lu Y *et al.* Meta-analysis comparing sevelamer and calcium-based phosphate binders on cardiovascular calcification in hemodialysis patients. *Nephron Clin Pract* 2010; 115: c259–c267
- Floege J, Covic AC, Ketteler M *et al.* Long-term effects of iron-based phosphate binder, sucroferric oxyhydroxide, in dialysis patients. *Nephrol Dial Transplant* 2015; 30: 1037–1046
- Higgins JPT, Green S. *Cochrane Handbook for Systematic Reviews of Interventions Version 5.1.0* [updated March 2011]. Cochrane Collaboration, 2011; [www.cochrane-handbook.org](http://www.cochrane-handbook.org)
- Altman DG, Andersen PK. Calculating the number needed to treat for trials where the outcome is time to an event. *BMJ* 1999; 319: 1492–1495
- Hildebrandt M, Vervölgyi E, Bender R. Calculation of NNTs in RCTs with time-to-event outcomes: a literature review. *BMC Med Res Methodol* 2009; 9: 21–27

22. Friedrich JO, Adhikari NK, Beyene J. Inclusion of zero total event trials in meta-analyses maintains analytic consistency and incorporates all available data. *BMC Med Res Methodol* 2007; 7: 1–6
23. Kuss O. Statistical methods for meta-analyses including information from studies without any events—add nothing to nothing and succeed nevertheless. *Stat Med* 2015; 34: 1097–1116
24. Sedgwick P. Meta-analyses: what is heterogeneity? *BMJ* 2015; 350: h1435
25. Braun J, Asmus HG, Holzer H *et al.* Long-term comparison of a calcium-free phosphate binder and calcium carbonate—phosphorus metabolism and cardiovascular calcification. *Clin Nephrol* 2004; 62: 104–115
26. Chennasamudram SP, Noor T, Vasylyeva TL. Comparison of sevelamer and calcium carbonate on endothelial function and inflammation in patients on peritoneal dialysis. *J Ren Care* 2013; 39: 82–89
27. De Santo NG, Frangiosa A, Anastasio P *et al.* Sevelamer worsens metabolic acidosis in hemodialysis patients. *J Nephrol* 2006; 19(Suppl 9): S108–S114
28. Di Iorio B, Bellasi A, Russo D. Mortality in kidney disease patients treated with phosphate binders: a randomized study. *Clin J Am Soc Nephrol* 2012; 7: 487–493
29. Di Iorio B, Molony D, Bell C *et al.* Sevelamer versus calcium carbonate in incident hemodialysis patients: results of an open-label 24-month randomized clinical trial. *Am J Kidney Dis* 2013; 62: 771–778
30. Ferreira A, Frazao JM, Monier-Faugere MC *et al.* Effects of sevelamer hydrochloride and calcium carbonate on renal osteodystrophy in hemodialysis patients. *J Am Soc Nephrol* 2008; 19: 405–412
31. Kakuta T, Tanaka R, Hyodo T *et al.* Effect of sevelamer and calcium-based phosphate binders on coronary artery calcification and accumulation of circulating advanced glycation end products in hemodialysis patients. *Am J Kidney Dis* 2011; 57: 422–431
32. Lin HH, Liou HH, Wu MS *et al.* Long-term sevelamer treatment lowers serum fibroblast growth factor 23 accompanied with increasing serum Klotho levels in chronic haemodialysis patients. *Nephrology (Carlton)* 2014; 19: 672–678
33. Sadek T, Mazouz H, Bahloul H *et al.* Sevelamer hydrochloride with or without alphacalcidol or higher dialysate calcium vs calcium carbonate in dialysis patients: an open-label, randomized study. *Nephrol Dial Transplant* 2003; 18: 582–588
34. Shaheen FA, Akeel NM, Badawi LS *et al.* Efficacy and safety of sevelamer. Comparison with calcium carbonate in the treatment of hyperphosphatemia in hemodialysis patients. *Saudi Med J* 2004; 25: 785–791
35. Vlassara H, Uribarri J, Cai W *et al.* Effects of sevelamer on HbA1c, inflammation, and advanced glycation end products in diabetic kidney disease. *Clin J Am Soc Nephrol* 2012; 7: 934–942
36. Russo D, Miranda I, Ruocco C *et al.* The progression of coronary artery calcification in predialysis patients on calcium carbonate or sevelamer. *Kidney Int* 2007; 72: 1255–1261
37. Caravaca F, Ruiz AB, Escola JM *et al.* Either calcium carbonate or sevelamer decreases urinary oxalate excretion in chronic renal failure patients. *Nefrologia* 2007; 27: 466–471
38. Koiwa F, Onoda N, Kato H *et al.* Prospective randomized multicenter trial of sevelamer hydrochloride and calcium carbonate for the treatment of hyperphosphatemia in hemodialysis patients in Japan. *Ther Apher Dial* 2005; 9: 340–346
39. Bleyer AJ, Burke SK, Dillon M *et al.* A comparison of the calcium-free phosphate binder sevelamer hydrochloride with calcium acetate in the treatment of hyperphosphatemia in hemodialysis patients. *Am J Kidney Dis* 1999; 33: 694–701
40. Caglar K, Yilmaz MI, Saglam M *et al.* Short-term treatment with sevelamer increases serum fetuin-a concentration and improves endothelial dysfunction in chronic kidney disease stage 4 patients. *Clin J Am Soc Nephrol* 2008; 3: 61–68
41. Barreto DV, Barreto Fde C, de Carvalho AB *et al.* Phosphate binder impact on bone remodeling and coronary calcification—results from the BRiC study. *Nephron Clin Pract* 2008; 110: c273–c283
42. Evenepoel P, Selgas R, Caputo F *et al.* Efficacy and safety of sevelamer hydrochloride and calcium acetate in patients on peritoneal dialysis. *Nephrol Dial Transplant* 2009; 24: 278–285
43. Hervás JG, Prados D, Cerezo S. Treatment of hyperphosphatemia with sevelamer hydrochloride in hemodialysis patients: a comparison with calcium acetate. *Kidney Int Suppl* 2003; 85: S69–S72
44. Lin YF, Chen YM, Hung KY *et al.* Benefits of sevelamer on markers of bone turnover in Taiwanese hemodialysis patients. *J Formos Med Assoc* 2010; 109: 663–672
45. Oliveira RB, Cancela AL, Gracioli FG *et al.* Early control of PTH and FGF23 in normophosphatemic CKD patients: a new target in CKD-MBD therapy? *Clin J Am Soc Nephrol* 2010; 5: 286–291
46. Qunibi W, Moustafa M, Muenz LR *et al.* A 1-year randomized trial of calcium acetate versus sevelamer on progression of coronary artery calcification in hemodialysis patients with comparable lipid control: the Calcium Acetate Renagel Evaluation-2 (CARE-2) study. *Am J Kidney Dis* 2008; 51: 952–965
47. Qunibi WY, Hootkins RE, McDowell LL *et al.* Treatment of hyperphosphatemia in hemodialysis patients: the Calcium Acetate Renagel Evaluation (CARE Study). *Kidney Int* 2004; 65: 1914–1926
48. Yilmaz MI, Sonmez A, Saglam M *et al.* Comparison of calcium acetate and sevelamer on vascular function and fibroblast growth factor 23 in CKD patients: a randomized clinical trial. *Am J Kidney Dis* 2012; 59: 177–185
49. Block GA, Wheeler DC, Persky MS *et al.* Effects of phosphate binders in moderate CKD. *J Am Soc Nephrol* 2012; 23: 1407–1415
50. de Francisco AL, Leidig M, Covic AC *et al.* Evaluation of calcium acetate/magnesium carbonate as a phosphate binder compared with sevelamer hydrochloride in haemodialysis patients: a controlled randomized study (CALMAG study) assessing efficacy and tolerability. *Nephrol Dial Transplant* 2010; 25: 3707–3717
51. Block GA, Spiegel DM, Ehrlich J *et al.* Effects of sevelamer and calcium on coronary artery calcification in patients new to hemodialysis. *Kidney Int* 2005; 68: 1815–1824
52. Chertow GM, Burke SK, Raggi P. Sevelamer attenuates the progression of coronary and aortic calcification in hemodialysis patients. *Kidney Int* 2002; 62: 245–252
53. Suki WN, Zabaneh R, Cangiano JL *et al.* Effects of sevelamer and calcium-based phosphate binders on mortality in hemodialysis patients. *Kidney Int* 2007; 72: 1130–1137
54. Kasai S, Sato K, Murata Y *et al.* Randomized crossover study of the efficacy and safety of sevelamer hydrochloride and lanthanum carbonate in Japanese patients undergoing hemodialysis. *Ther Apher Dial* 2012; 16: 341–349
55. Sprague SM, Ross EA, Nath SD *et al.* Lanthanum carbonate vs. sevelamer hydrochloride for the reduction of serum phosphorus in hemodialysis patients: a crossover study. *Clin Nephrol* 2009; 72: 252–258
56. Zwiech R, Dryja P, Lacina D *et al.* The influence of short-term magnesium carbonate treatment on calcium-phosphorus balance in dialysis patients. *Wiad Lek* 2011; 64: 9–14
57. Abraham G, Kher V, Saxena S *et al.* Sevelamer carbonate experience in Indian end stage renal disease patients. *Indian J Nephrol* 2012; 22: 189–192
58. Delmez J, Block G, Robertson J *et al.* A randomized, double-blind, crossover design study of sevelamer hydrochloride and sevelamer carbonate in patients on hemodialysis. *Clin Nephrol* 2007; 68: 386–391
59. Fan S, Ross C, Mitra S *et al.* A randomized, crossover design study of sevelamer carbonate powder and sevelamer hydrochloride tablets in chronic kidney disease patients on haemodialysis. *Nephrol Dial Transplant* 2009; 24: 3794–3799
60. D'Haese PC, Spasovski GB, Sikole A *et al.* A multicenter study on the effects of lanthanum carbonate (Fosrenol) and calcium carbonate on renal bone disease in dialysis patients. *Kidney Int Suppl* 2003; 85: S73–S78
61. Spasovski GB, Sikole A, Gelev S *et al.* Evolution of bone and plasma concentration of lanthanum in dialysis patients before, during 1 year of treatment with lanthanum carbonate and after 2 years of follow-up. *Nephrol Dial Transplant* 2006; 21: 2217–2224
62. Shigematsu T; Lanthanum Carbonate Group. Multicenter prospective randomized, double-blind comparative study between lanthanum carbonate and calcium carbonate as phosphate binders in Japanese hemodialysis patients with hyperphosphatemia. *Clin Nephrol* 2008; 70: 404–410
63. Wada K, Wada Y. Evaluation of aortic calcification with lanthanum carbonate vs. calcium-based phosphate binders in maintenance hemodialysis patients with type 2 diabetes mellitus: an open-label randomized controlled trial. *Ther Apher Dial* 2014; 18: 353–360
64. Ohtake T, Kobayashi S, Oka M *et al.* Lanthanum carbonate delays progression of coronary artery calcification compared with calcium-based

- phosphate binders in patients on hemodialysis: a pilot study. *J Cardiovasc Pharmacol Ther* 2013; 18: 439–446
65. Soriano S, Ojeda R, Rodríguez M *et al.* The effect of phosphate binders, calcium and lanthanum carbonate on FGF23 levels in chronic kidney disease patients. *Clin Nephrol* 2013; 80: 17–22
66. Toussaint ND, Lau KK, Polkinghorne KR *et al.* Attenuation of aortic calcification with lanthanum carbonate versus calcium-based phosphate binders in haemodialysis: a pilot randomized controlled trial. *Nephrology (Carlton)* 2011; 16: 290–298
67. Hutchison AJ, Maes B, Vanwalleghem J *et al.* Efficacy, tolerability, and safety of lanthanum carbonate in hyperphosphatemia: a 6-month, randomized, comparative trial versus calcium carbonate. *Nephron Clin Pract* 2005; 100: c8–c19
68. Lee YK, Choi HY, Shin SK *et al.* Effect of lanthanum carbonate on phosphate control in continuous ambulatory peritoneal dialysis patients in Korea: a randomized prospective study. *Clin Nephrol* 2013; 79: 136–142
69. Toida T, Fukudome K, Fujimoto S *et al.* Effect of lanthanum carbonate vs. calcium carbonate on serum calcium in hemodialysis patients: a crossover study. *Clin Nephrol* 2012; 78: 216–223
70. Scaria PT, Gangadhar R, Pisharody R. Effect of lanthanum carbonate and calcium acetate in the treatment of hyperphosphatemia in patients of chronic kidney disease. *Indian J Pharmacol* 2009; 41: 187–191
71. Liu YL, Lin HH, Yu CC *et al.* A comparison of sevelamer hydrochloride with calcium acetate on biomarkers of bone turnover in hemodialysis patients. *Ren Fail* 2006; 28: 701–707
72. Navarro-Gonzalez JF, Mora-Fernandez C, Muros de Fuentes M *et al.* Effect of phosphate binders on serum inflammatory profile, soluble CD14, and endotoxin levels in hemodialysis patients. *Clin J Am Soc Nephrol* 2011; 6: 2272–2279
73. Chen JB, Chiang SS, Chen HC *et al.* Efficacy and safety of SBR759, a novel calcium-free, iron(III)-based phosphate binder, in Asian patients undergoing hemodialysis: a 12-week, randomized, open-label, dose-titration study versus sevelamer hydrochloride. *Nephrology (Carlton)* 2011; 16: 743–750
74. Floege J, Covic AC, Ketteler M *et al.* A phase III study of the efficacy and safety of a novel iron-based phosphate binder in dialysis patients. *Kidney Int* 2014; 86: 638–647
75. Yokoyama K, Akiba T, Fukagawa M *et al.* A randomized trial of JTT-751 versus sevelamer hydrochloride in patients on hemodialysis. *Nephrol Dial Transplant* 2014; 29: 1053–1060
76. Galassi A, Spiegel DM, Bellasi A *et al.* Accelerated vascular calcification and relative hypoparathyroidism in incident haemodialysis diabetic patients receiving calcium binders. *Nephrol Dial Transplant* 2006; 21: 3215–3222
77. Russo D, Bellasi A, Pota A *et al.* Effects of phosphorus-restricted diet and phosphate-binding therapy on outcomes in patients with chronic kidney disease. *J Nephrol* 2015; 28: 73–80
78. Garg JP, Chasan-Taber S, Blair A *et al.* Effects of sevelamer and calcium-based phosphate binders on uric acid concentrations in patients undergoing hemodialysis: a randomized clinical trial. *Arthritis Rheum* 2005; 52: 290–295
79. Freemont AJ, Hoyland JA, Denton J; Lanthanum Carbonate SPD405-303 Study Group. The effects of lanthanum carbonate and calcium carbonate on bone abnormalities in patients with end-stage renal disease. *Clin Nephrol* 2005; 64: 428–437
80. Ruggeri M, Bellasi A, Cipriani F *et al.* Sevelamer is cost effective versus calcium carbonate for the first-line treatment of hyperphosphatemia in new patients to hemodialysis: a patient-level economic evaluation of the INDEPENDENT-HD study. *J Nephrol* 2015; 28: 593–602
81. Ruggeri M, Cipriani F, Bellasi A *et al.* Sevelamer is cost-saving vs. calcium carbonate in non-dialysis-dependent CKD patients in Italy: a patient-level cost-effectiveness analysis of the INDEPENDENT study. *Blood Purif* 2014; 37: 316–324
82. Wang C, Liu X, Zhou Y *et al.* New conclusions regarding comparison of sevelamer and calcium-based phosphate binders in coronary-artery calcification for dialysis patients: a meta-analysis of randomized controlled trials. *PLoS One* 2015; 10: e0133938
83. Sekercioglu N, Thabane L, Díaz Martínez JP *et al.* Comparative effectiveness of phosphate binders in patients with chronic kidney disease: a systematic review and network meta-analysis. *PLoS One* 2016; 11: e0156891
84. Block GA, Raggi P, Bellasi A *et al.* Mortality effect of coronary calcification and phosphate binder choice in incident hemodialysis patients. *Kidney Int* 2007; 71: 438–441
85. Takei T, Otsubo S, Uchida K *et al.* Effects of sevelamer on the progression of vascular calcification in patients on chronic haemodialysis. *Nephron Clin Pract* 2008; 108: c278–83
86. Lundh A, Sisonondo S, Lexchin J *et al.* Industry sponsorship and research outcome. *Cochrane Database Syst Rev* 2012; 12: MR000033
87. Ortiz A, Sanchez-Niño MD. The demise of calcium-based phosphate binders. *Lancet* 2013; 382: 1232–1234
88. Baldwin C, Farah M, Leung M *et al.* Multi-intervention management of calciphylaxis: a report of 7 cases. *Am J Kidney Dis* 2011; 58: 988–991
89. Eddington H, Hoefield R, Sinha S *et al.* Serum phosphate and mortality in patients with chronic kidney disease. *Clin J Am Soc Nephrol* 2010; 5: 2251–2257
90. Block GA, Hulbert-Shearon TE, Levin NW *et al.* Association of serum phosphorus and calcium x phosphate product with mortality risk in chronic hemodialysis patients: a national study. *Am J Kidney Dis* 1998; 31: 607–617
91. Da J, Xie X, Wolf M *et al.* Serum phosphorus and progression of CKD and mortality: a meta-analysis of cohort studies. *Am J Kidney Dis* 2015; 66: 258–265
92. Pletcher MJ, Tice JA, Pignone M *et al.* Using the coronary artery calcium score to predict coronary heart disease events: a systematic review and meta-analysis. *Arch Intern Med* 2004; 164: 1285–1292
93. Stevens LA, Djurdjev O, Cardew S *et al.* Calcium, phosphate, and parathyroid hormone levels in combination and as a function of dialysis duration predict mortality: evidence for the complexity of the association between mineral metabolism and outcomes. *J Am Soc Nephrol* 2004; 15: 770–779
94. Baigent C, Landray M, Reith C *et al.* The effects of lowering LDL cholesterol with simvastatin plus ezetimibe in patients with chronic kidney disease (Study of Heart and Renal Protection): a randomised placebo-controlled trial. *Lancet* 2011; 377: 2181–2192
95. Nguyen QV, Descombes E. Mortality effect of coronary calcification and phosphate binder choice in incident hemodialysis patients. No good evidence to promote a general use of sevelamer. *Kidney Int* 2008; 73: 238–239; author reply 239
96. Frazao JM, Adragao T. Treatment of hyperphosphatemia with sevelamer hydrochloride in dialysis patients: effects on vascular calcification, bone and a close look into the survival data. *Kidney Int Suppl* 2008; 111: S38–S43
97. KDIGO clinical practice guideline for the diagnosis, evaluation, prevention, and treatment of chronic kidney disease–mineral and bone disorder (CKD–MBD). *Kidney Int* 2009; 76(Suppl 113): S22–S49

Received for publication: 29.3.2016; Accepted in revised form: 13.7.2016
